# Supplementary material for: Coronary microvascular dysfunction in gestational diabetes: Insights on possible mechanism from a large institutional registry
Source: Research Square preprint supplement (doi:10.21203/rs.3.rs-7194002/v1), 2025-08-04
Supplement: Supplementary file 1 [file d639e925dcbbbe46ed32955f.docx]

The final version of the manuscript was prepared on an IBM-compatible PC using Microsoft Word. This manuscript has not been published previously, and is not being considered for publication elsewhere in any language. All authors have read and approved its submission regarding this manuscript
